# Supplementary material for: The Evaluation of Clinical Signs and Symptoms of Malignant Tumors Involving the Maxillary Sinus: Recommendation of an Examination Sieve and Risk Alarm Score
Source: Healthcare (Basel). 2023 Jan 9;11(2):194. doi: 10.3390/healthcare11020194 (PMC9859382; doi:10.3390/healthcare11020194)
Supplement: Supplementary file 1 [file healthcare-11-00194-s001.zip › Supplementary Table S1.pdf]

**Supplementary Table S1.** Malignant tumors of maxillary sinus, symptoms for early Diagnosis and Risk Alarm Score.

| Clinical Symptoms Region                                                                                                                                                                                                                              | Description of Symptoms                                                   | Score |
|-------------------------------------------------------------------------------------------------------------------------------------------------------------------------------------------------------------------------------------------------------|---------------------------------------------------------------------------|-------|
| Oral Symptoms                                                                                                                                                                                                                                         | Painless palatal or buccal oral mucosal ulceration                        | 1     |
|                                                                                                                                                                                                                                                       | Maxillary alveolar bone or palatal enlargement                            | 1     |
|                                                                                                                                                                                                                                                       | Oro-antral communication post hypermobile tooth extraction                | 1     |
|                                                                                                                                                                                                                                                       | Extemporaneous exfoliation sound permanent dentition                      | 1     |
|                                                                                                                                                                                                                                                       | Unilateral, unexplained mobility of permanent periodontally healthy teeth | 1     |
|                                                                                                                                                                                                                                                       | Unexplained and permanent numbness of maxillary dentition                 | 1     |
| Nasal Symptoms                                                                                                                                                                                                                                        | Unilateral nasal obstruction and anosmia                                  | 1     |
|                                                                                                                                                                                                                                                       | Unilateral bloodstained discharge                                         | 1     |
| Orbital Symptoms                                                                                                                                                                                                                                      | Exophthalmos                                                              | 1     |
|                                                                                                                                                                                                                                                       | Increased lacrimation                                                     | 1     |
|                                                                                                                                                                                                                                                       | Diplopia                                                                  | 1     |
|                                                                                                                                                                                                                                                       | Proptosis                                                                 | 1     |
|                                                                                                                                                                                                                                                       | Recurrent conjunctivitis                                                  | 1     |
| Neurological Symptoms                                                                                                                                                                                                                                 | Absent and decreased corneal reflex                                       | 1     |
|                                                                                                                                                                                                                                                       | Infraorbital, cheek paresthesia, or anesthesia                            | 1     |
| This criterion will identify individuals with a risk of suspected MTMS that should prompt dental practitioners to further investigations and subsequent referrals to specialist clinics                                                               |                                                                           |       |
| Total MTMS score 15, a) 0-5 mild, b) 5-10 moderate, c) 10-15 severe                                                                                                                                                                                   |                                                                           |       |
| <ul style="list-style-type: none"><li>• Greater than 3 scores in oral symptoms</li><li>• Greater than 1 score in nasal symptoms</li><li>• Greater than 2 scores in orbital symptoms</li><li>• Greater than 1 score in neurological symptoms</li></ul> |                                                                           |       |
| Should be considered high risk for MTMS                                                                                                                                                                                                               |                                                                           |       |
